# Supplementary material
Source: PubMed Central journal article supplement (PMC3536133)
Supplement: IAI.00991-12_zii999099959so1.pdf [file IAI.00991-12_zii999099959so1.pdf]

```

F. tularensis LVS (FTL_0724)      MDKNQIRRELLNIRDSL--INKTYLSEQISSKLISYIQANFTNPKIGSFA 48
M. pneumoniae FH (MPNE_0404)     MDKNALRKQILQKRMALSTIEKSHLDQKINQKLVAF LTPKPCIKTIALYE 50
**** *:>::*: * :* *:>::*::*..**::: : . . :

F. tularensis LVS (FTL_0724)      SLKNEIDTQTINNHFENIYLPVHPFIKHGLWFARDSKYYLNKYKIKEP 98
M. pneumoniae FH (MPNE_0404)     PIKNEVT--FVDFFFELKINQIRAVYPK--VISDTEIIFIDQ----- 89
.:***:  : .** : : :... : . *:: :::

F. tularensis LVS (FTL_0724)      VYCVKDVVTAWELDIIIVPMVGFTSDKFRMGMGGGFYDYNLSFKKIHKWP 148
M. pneumoniae FH (MPNE_0404)     ---ETNTFEPNQIDCF LIPLVGFNKNYRLGFGKGYDR--YLMQLTRQQ 134
. . . . ::* :::*::**..*::** *:* * : : :

F. tularensis LVS (FTL_0724)      LTIGIAFDEQQONNAI IIDKHDIKLDLIITPTRIL 182
M. pneumoniae FH (MPNE_0404)     PKIGIAYSFQKG-DFLADPVDVQLDLIINDE--- 164
.*****. *:. : * *::*****.

```

Key:  
 \* = Identical residue  
 : = Conserved substitution  
 . = Semi-conserved substitution  
 = Non-conserved substitution

Supplementary Figure 1. Alignment of the 5-formyltetrahydrofolate cycloligase protein sequence from *F. tularensis* LVS (FTL\_0724) and *M. pneumoniae* FH (MPNE\_0404).
